# Supplementary material for: Measuring outcome differences associated with STEMI screening and diagnostic performance: a multicentred retrospective cohort study protocol
Source: PubMed Central journal article supplement — BMJ Open. 2018 May 3;8(5):e022453. doi: 10.1136/bmjopen-2018-022453 (PMC5942471; doi:10.1136/bmjopen-2018-022453), 2018-05-03
Supplement: bmjopen-2018-022453.reviewer_comments.pdf [file bmjopen-2018-022453.reviewer_comments.pdf]

## PEER REVIEW HISTORY

BMJ Open publishes all reviews undertaken for accepted manuscripts. Reviewers are asked to complete a checklist review form (<http://bmjopen.bmj.com/site/about/resources/checklist.pdf>) and are provided with free text boxes to elaborate on their assessment. These free text comments are reproduced below.

## ARTICLE DETAILS

|                            |                                                                                                                                                                                                                                                                                                                                    |
|----------------------------|------------------------------------------------------------------------------------------------------------------------------------------------------------------------------------------------------------------------------------------------------------------------------------------------------------------------------------|
| <b>TITLE (PROVISIONAL)</b> | Measuring Outcome Differences Associated with STEMI Screening and Diagnostic Performance: A Multi-centered Retrospective Cohort Study Protocol                                                                                                                                                                                     |
| <b>AUTHORS</b>             | Yiadam, Maame Yaa; Mumma, B; Baugh, Christopher; Patterson, Brian; Mills, Angela; Salazar, Gilberto; Tanski, Mary; Jenkins, Cathy; Vogus, Timothy; Miller, Karen; Jackson, Brittney; Lehmann, Christoph; Dornier, Stephen; West, Jennifer; Wang, Thomas; Collins, Sean P.; Dittus, Robert; Bernard, GR; Storrow, Alan; Liu, Dandan |

This article was not externally reviewed at BMJ Open. Protocols that have been independently assessed prior to submission to BMJ Open are usually fast-tracked to publication on the grounds that further substantial changes will not be possible. This independent assessment will usually be external, independent review for both a substantial grant award from a non-commercial or government funder and ethics approval.
